1 **Title:** Illuminating Uveitis: Metagenomic Deep Sequencing Identifies Common and Rare Pathogens

2

3 Thuy Doan, MD, PhD<sup>1,2#</sup>, Michael R. Wilson, MD<sup>3,4#</sup>, Emily D. Crawford, PhD<sup>3,6</sup>, Eric D. Chow,

4 PhD<sup>3</sup>, Lillian M. Khan, BS<sup>3</sup>, Kristeene A. Knopp, PhD<sup>3</sup>, Dongxiang Xia, MD, PhD<sup>5</sup>, Jill K.

5 Hacker, PhD, MPH<sup>5</sup>, Jay M. Stewart, MD<sup>2</sup>, John A. Gonzales, MD<sup>1,2</sup>, Nisha R. Acharya, MD,

6 MPH<sup>1,2</sup>, Joseph L. DeRisi, PhD<sup>3,6\*</sup>

7

8 <sup>1</sup>Francis I. Proctor Foundation, University of California San Francisco, San Francisco, CA, USA

9 <sup>2</sup>Department of Ophthalmology, University of California, San Francisco, CA, USA

10 <sup>3</sup>Department of Biochemistry and Biophysics, University of California, San Francisco, CA, USA

11 <sup>4</sup>Department of Neurology, University of California, San Francisco, CA, USA

12 <sup>5</sup>California Department of Public Health, Richmond, CA, USA

13 <sup>6</sup>Howard Hughes Medical Institute, Chevy Chase, MD, USA

14 <sup>#</sup>These authors contributed equally to this work

15 <sup>\*</sup>Corresponding Author: Joseph L. DeRisi, PhD, Department of Biochemistry and Biophysics,

16 University of California, San Francisco, CA, USA. Tel: (415) 418-3059, Email:

17 [joe@derisilab.ucsf.edu](mailto:joe@derisilab.ucsf.edu), URL: <http://derisilab.ucsf.edu>

18

19

20

## 21 **SUMMARY**

### 22 **Background**

23 Ocular infections remain a major cause of blindness and morbidity worldwide. While prognosis is  
24 dependent on the timing and accuracy of diagnosis, the etiology remains elusive in ~ 50% of  
25 presumed infectious uveitis cases.<sup>1,2</sup> We aimed to determine if unbiased metagenomic deep  
26 sequencing (MDS) can accurately detect pathogens in intraocular fluid samples of patients with  
27 uveitis.

28

### 29 **Methods**

30 This is a proof-of-concept study, in which intraocular fluid samples were obtained from 5 subjects  
31 with known diagnoses, and one subject with bilateral chronic uveitis without a known etiology.  
32 Samples were subjected to MDS, and results were compared with conventional diagnostic tests.  
33 Pathogens were identified using a rapid computational pipeline to analyze the non-host sequences  
34 obtained from MDS.

35

### 36 **Findings**

37 Unbiased MDS of intraocular fluid produced results concordant with known diagnoses in subjects  
38 with (n=4) and without (n=1) uveitis. Rubella virus (RV) was identified in one case of chronic  
39 bilateral idiopathic uveitis. The subject's strain was most closely related to a German RV strain  
40 isolated in 1992, one year before he developed a fever and rash while living in Germany.

41

### 42 **Interpretation**

43 MDS can identify fungi, parasites, and DNA and RNA viruses in minute volumes of intraocular  
44 fluid samples. The identification of chronic intraocular RV infection highlights the eye's role as a  
45 long-term pathogen reservoir, which has implications for virus eradication and emerging global  
46 epidemics.

47

48

## 49 INTRODUCTION

50 Ocular infection is an important cause of ocular morbidity and blindness worldwide. However,  
51 diagnosis is challenging due to the multitude of possible pathogens. Sensitivity of culture-based  
52 assays ranges from 40-70%, and available molecular diagnostics target only a fraction of pathogens  
53 known to cause ocular disease.<sup>1-3</sup> These limitations are exacerbated by: (1) the inability to collect  
54 large intraocular fluid volumes given the eye's small and delicate anatomy, and (2) the difficulty  
55 distinguishing clinically between infectious and non-infectious causes of ocular inflammation.

56  
57 The urgency to develop better diagnostics for uveitis has been compounded by the recent cases of  
58 persistent infection with Ebola virus<sup>4</sup>, and possibly Zika virus.<sup>5</sup> These cases highlight the eye's role  
59 as a potential reservoir for infectious agents with important public health consequences. It is  
60 essential that more sensitive, unbiased, and comprehensive approaches are developed to efficiently  
61 diagnose ocular infections.

62  
63 Rapid advances in sequencing technology and bioinformatics have made metagenomics a fertile  
64 area for developing clinical diagnostics.<sup>6-8</sup> We evaluated the utility of an hypothesis-free approach  
65 to identify ocular infections by performing unbiased metagenomic deep sequencing (MDS) on total  
66 RNA extracted from the intraocular fluid of subjects with inflammatory and non-inflammatory eye  
67 diseases.

## 68 69 METHODS

70 **Study Design:** Six subjects were recruited for a research study using unbiased MDS to identify  
71 potential pathogens in intraocular fluid (aqueous or vitreous) (Table 1). This study was approved by

72 the Institutional Review Board of the University of California, San Francisco (UCSF). Five of the  
73 six subjects served as controls to benchmark the ability of MDS to identify a variety of pathogens;  
74 Subjects 1-3 had ocular infections with herpes simplex virus 1 (HSV-1), *Cryptococcus neoformans*,  
75 and *Toxoplasma gondii*, respectively. Subject 4 had non-infectious uveitis, and subject 5 had no  
76 ocular inflammation but had intraocular fluid obtained at the time of a retinal membrane peel. MDS  
77 was also used to investigate subject 6 who had bilateral uveitis that had defied a 16-year diagnostic  
78 work-up at multiple academic centers across two continents (Table 1 and Figure 1A).

79

80 **Sequencing Library Preparation:** Samples were prepared for MDS as previously described.<sup>6</sup>

81 Briefly, RNA was extracted from 20-50  $\mu$ L of intraocular fluid and randomly amplified to double-  
82 stranded complementary DNA (cDNA) using the NuGEN Ovation v.2 kit (NuGEN, CA). cDNA  
83 was tagmented with Nextera (Illumina, CA). Depletion of Abundant Sequences by Hybridization  
84 (DASH), a novel molecular technique using the CRISPR (Clustered Regularly Interspaced Short  
85 Palindromic Repeats)-associated nuclease Cas9 *in vitro*, selectively depleted human mitochondrial  
86 cDNAs from the tagmented library, thus, enriching the MDS library for non-human (i.e., microbial)  
87 sequences.<sup>9</sup> One sample was prepared with New England Biolabs' (NEB) Next modules to generate  
88 cDNA and the NEB Next Ultra II DNA kit to convert the cDNA into sequencing libraries (NEB,  
89 MA). Library size and concentration were determined using the Blue Pippin (Sage Science, MA)  
90 and Kapa Universal quantitative PCR kit (Kapa Biosystems, Woburn, MA), respectively. Samples  
91 were sequenced on an Illumina HiSeq 2500 instrument using 135/135 base pair (bp) paired-end  
92 sequencing.<sup>6,7</sup>

93

94 **Bioinformatics:** Sequencing data were analyzed using a rapid computational pipeline developed by  
95 the DeRisi Laboratory to classify MDS reads and identify potential pathogens by comparison to the  
96 entire National Center for Biotechnology Information (NCBI) nucleotide (nt) reference database.<sup>6</sup>  
97 The full dataset for each subject was analyzed in less than five minutes. Briefly, paired-end reads  
98 were quality filtered using PriceSeqFilter.<sup>10</sup> Human sequence was removed by alignment to the  
99 human reference genome (hg38) using STAR.<sup>11</sup> Unaligned reads that were at least 95% identical  
100 were compressed by cd-hit-dup (v4.6.1). These reads were then used as queries to search the NCBI  
101 nt database (July 2015) using gsnapl (v2015-12-31).<sup>12</sup>

102

## 103 **RESULTS**

### 104 **MDS to Detect Pathogens in Uveitis**

105 MDS accurately detected viral (HSV-1), protozoan (*T. gondii*), and fungal (*C. neoformans*)  
106 infections in subjects 1-3 and did not detect microbes other than known laboratory and  
107 environmental contaminants in subjects 4 and 5 (Table 1).

108

109 In subject 6, MDS detected a single candidate pathogen: rubella virus (RV) in an aqueous fluid  
110 specimen collected in 2014. 599 non-redundant sequence pairs mapped to both the non-structural  
111 and structural open reading frames (ORFs) of the RV genome. No sequences aligning to RV were  
112 present in the water control or the 18 other cerebrospinal or intraocular fluid samples sequenced on  
113 the same run. No RV reads have ever been detected previously in this laboratory.

114

115 Subject 6 was a 40 year-old man with a 16-year history of inflammation in both eyes whose  
116 extensive diagnostic work-up in Germany and the U.S. had been unrevealing (Table 1 and Figure

117 1A). In 1993 he had a three-day febrile illness accompanied by a rash that spread from his back to  
118 his extremities. He was diagnosed with anterior uveitis of the left eye in 1999 and in 2001,  
119 developed anterior uveitis of the contralateral eye. Topical steroid and non-steroidal anti-  
120 inflammatory drops were ineffective. Oral steroids were added in 2009 followed by methotrexate.  
121 His inflammation did not improve after one year of combined immunotherapy, and his medications  
122 were discontinued.

123

124 He presented to the Francis I. Proctor Foundation and UCSF in 2012 with moderate anterior and  
125 intermediate uveitis associated with ocular hypertension and diffuse stellate keratic precipitates in  
126 both eyes (Figure 1C) and asymmetrical iris atrophy leading to heterochromia (Figure 1B). These  
127 findings were suggestive of viral-related uveitis, and the subject underwent an anterior chamber  
128 paracentesis of the left eye. 100  $\mu$ L of aqueous fluid was sent for polymerase chain reaction (PCR)  
129 testing for cytomegalovirus (CMV), varicella-zoster virus (VZV), and HSV-1/2. Despite negative  
130 results, suspicion for viral infection remained high. Antiviral therapy was initiated and continued for  
131 three years (Figure 1A), but failed to curb the inflammation. In 2014 he had a paracentesis of the  
132 right eye and a therapeutic vitrectomy of the left eye. Repeat infectious disease diagnostics were  
133 unrevealing (Figure 1A).

134

### 135 **Confirmatory testing for RV infection**

136 A 183 nt RNA fragment was reverse transcribed and amplified from the subject's aqueous fluid  
137 collected from the right eye in 2014, using a published reverse transcription PCR (RT-PCR) assay  
138 for detecting the RV E1 gene.<sup>13</sup> Sanger sequencing confirmed that the amplicon was the RV E1  
139 gene (Elim Bio, CA). This result was corroborated by the California Department of Public Health's

140 (CDPH) Viral and Rickettsial Disease Laboratory who performed RT-PCR and Sanger sequenced  
141 the 739 nt RV sequence required for genotype assignment (Sequetech Corp, CA).<sup>14,15</sup> RV was not  
142 detected via RT-PCR in nasopharyngeal swab, urine, or tear samples collected in February 2016,  
143 indicating that the subject was not actively shedding virus. Serologic testing for RV IgG was  
144 positive.

145  
146 An archived sample from the subject's 2014 left eye vitrectomy subsequently underwent MDS  
147 using the same protocol. While the sample was not flash-frozen and was not stored to optimally  
148 preserve RNA integrity, ten unique sequence pairs aligned to the RV non-structural ORF. The  
149 detection of RV in both eyes corroborated the clinical suspicion of bilateral viral infection and  
150 demonstrated the robustness of MDS to detect pathogens despite suboptimal sample handling.

151

### 152 **Characterization of RV Sequences**

153 The subject's original MDS data were combined with sequencing data obtained from four replicate  
154 sequencing runs. These reads were aligned using bowtie2 v2.2.8 to the complete RV genome  
155 (GenBank DQ388280.1).<sup>16</sup> 9,188 bp mapped, covering 95.1% of the reference genome (Figure  
156 2A). This represents the most extensive coverage of an RV genome detected from any intraocular  
157 sample and suggests that the RV genomes are full length.<sup>17</sup>

158

### 159 **Phylogenetic analysis of the subject's RV genome**

160 The 739 nt segment of the RV E1 gene isolated from subject 6 with MDS was compared against the  
161 32 World Health Organization (WHO) RV reference strains using MUltiple Sequence Comparison  
162 by Log-Expectation (MUSCLE).<sup>18-20</sup> His strain most closely aligned to the 1G genotype (Figure



163 2B). Of the three lineages of the 1G genotype, the lineage containing the Stuttgart strain circulated  
164 in Germany, Italy, and the United Kingdom in the early 1990s. Thus, this subject's RV strain is  
165 temporally and geographically most proximate to the RV strain that was known to be circulating  
166 when he developed a rash and fever in 1993 in Germany.

167

168 The RV sequence (9,188 nt) obtained from our subject includes 128 nt substitutions relative to the  
169 1992 Stuttgart strain (GenBank DQ388280.1). This substitution rate of  $6.97 \times 10^{-4}$   
170 substitutions/site/year over the 20-year period is within two-fold of the RV evolutionary rate  
171 calculated as part of epidemiologic studies evaluating person-to-person transmission ( $1.19 \times 10^{-3}$  to  
172  $1.94 \times 10^{-3}$  substitutions/site/year).<sup>21</sup> Of the 128 substitutions, 92 were synonymous (Figure 2A). Of  
173 the 36 non-synonymous mutations, 19 occurred within the coding region for the E1 and E2  
174 glycoproteins. Per unit length, the number of non-synonymous mutations in the E1 and E2  
175 structural proteins was 4.1-fold higher than the non-structural proteins. Considering all mutations in  
176 this region, the substitution rate in E1 and E2 was  $1.05 \times 10^{-3}$  substitutions/site/year. We note that  
177 this mutational imbalance associated with E1 and E2 compared to the non-structural proteins is  
178 consistent with persistent viral replication under immunological pressure.<sup>22</sup>

179

## 180 **DISCUSSION**

181 Our results demonstrate that unbiased MDS can detect fungi, parasites, DNA viruses and RNA  
182 viruses in minute volumes of intraocular fluid from patients with uveitis. In addition to correctly  
183 identifying the causative agent in three infected positive control subjects (1-3) and detecting only  
184 background microbial contamination in two uninfected subjects (4 and 5), MDS revealed RV in a  
185 subject (6) who had a 16-year history of bilateral uveitis.

186

187 RV is a positive sense single-stranded RNA virus in the genus *Rubivirus* of the *Togaviridae* family  
188 that causes transient body rash and fever in healthy adults but can also cause devastating birth  
189 defects.<sup>23</sup> RV has also been associated with Fuchs uveitis syndrome (FUS), a rare form of chronic  
190 intraocular inflammation most often characterized by mild anterior chamber reaction, iris atrophy  
191 with or without heterochromia, late onset ocular hypertension, and minimal associated visual  
192 complaints.<sup>17,24,25</sup> In a subset of FUS patients, either RV IgG or RV RNA has been detected in  
193 ocular fluid by Goldmann-Witmer coefficient analysis or RT-PCR, respectively.<sup>17,24,26</sup> These tests  
194 are only validated for ocular fluid at a few centers in Europe and are not diagnostically available in  
195 the U.S.

196

197 The protracted diagnostic challenge in our subject is three-fold: (1) diagnostic tests are lacking for  
198 ocular inflammation, (2) the subject's clinical findings were not consistent with FUS until many  
199 years after disease onset, and (3) the subject's relevant infectious exposure occurred six years prior  
200 to the onset of his ocular symptoms. This case highlights the advantage of an hypothesis-free  
201 approach in which a single MDS assay can detect a multitude of pathogens that may or may not  
202 have been previously associated with a particular clinical syndrome.

203

204 The identification of RV RNA in our subject's eyes underscores current challenges in infectious  
205 disease surveillance. The WHO declared RV eliminated in the U.S. in 2005 as a result of effective  
206 and long-standing vaccination policies, but RV remains a threat throughout much of the world.<sup>27,28</sup>  
207 Our subject's ocular inflammation predated his measles, mumps and rubella (MMR) vaccination by  
208 seven years, and his RV strain most closely matched the strain circulating in his home country of

209 Germany at the time of his rash and fever in 1993, and not the vaccine strain (Figure 2B). This is  
210 consistent with the notion that RV likely seeded his eyes during this primary infection. Although his  
211 immune system cleared the infection peripherally, RV sequestered in the ocular compartment and  
212 persisted presumably due to relative immune privilege. Indeed, our analysis of the RV genome  
213 provides the first molecular evidence for active RV replication in FUS. Ocular RNA virus  
214 sequestration is not a phenomenon relating solely to RV, as Ebola virus was recently detected in the  
215 ocular fluid of a patient nine weeks after resolution of his viremia.<sup>4</sup> Using RT-PCR for RV on our  
216 subject's tears, we were not able to detect shedding of RV, although longitudinal studies are  
217 required to determine whether intermittent shedding through tears can occur. As we devise  
218 strategies to rapidly identify and control emerging and re-emerging infectious diseases, expanding  
219 the scope of pathogen detection to the eyes and other immune privileged sites may be of critical  
220 importance.

221  
222 Diagnostic tests for intraocular infection fundamentally differ from those for systemic infections  
223 because of the small sample volume that can be safely obtained from the eye. Unbiased MDS may  
224 circumvent this limitation, as it detects many infectious organisms with a single assay requiring as  
225 little as 20  $\mu$ L of intraocular fluid. Not only does MDS have the potential to alter the paradigm for  
226 infectious disease diagnostics in ophthalmology, but it may also provide another valuable public  
227 health tool to surveil for re-emerging and emerging infectious diseases in immune privileged body  
228 sites.

229

230 **CONTRIBUTORS**

231 TD and MRW contributed equally and therefore are co-first authors. JLD and NRA conceived the  
232 study. JLD, MRW, and TD developed study protocol and design, and were responsible for the study  
233 implementation and project management. TD, MRW, LMK, Emily D. Crawford, and Eric D. Chow  
234 performed library preparation and sequencing. JLD, MRW, and TD performed statistical analysis.  
235 TD, MRW, and KAK performed rubella RT-PCR. DX and JKH supervised the confirmatory rubella  
236 RT-PCR at the CDPH. TD, NRA, JG, and JMS obtained clinical samples and participated in patient  
237 care. TD, MRW, and JLD wrote the first draft of the article. All authors contributed to the  
238 interpretation of the data and the writing and editing of the article.

239

240 **DECLARATION OF INTEREST**

241 We declare no competing interest.

242

243 **ACKNOWLEDGMENTS**

244 Research reported in this publication was supported by a grant from the UCSF Resource Allocation  
245 Program for Junior Investigators in Basic and Clinical/Translation Science (T.D.); UCSF Center for  
246 Next-Gen Precision Medicine supported by the Sandler and William K. Bowes, Jr. Foundations  
247 (J.L.D. and M.R.W.); Howard Hughes Medical Institute (J.L.D.); the National Center for  
248 Advancing Translational Sciences of the NIH under Award Number KL2TR000143 (M.R.W.); the  
249 Cooperative Agreement Number U60OE000103, funded by the Centers for Disease Control (CDC)  
250 and Prevention through the Association of Public Health Laboratories (D.X. and J.K.H). Its contents  
251 are solely the responsibility of the authors and do not necessarily represent the official views of the

252 CDC, the Department of Health and Human Services, the Association of Public Health  
253 Laboratories, or the NIH.  
254  
255 We thank Derek Bogdanoff in the UCSF Center for Advanced Technology for his expertise and  
256 assistance operating the Illumina sequencer and Dr. Steven Miller, Director of the UCSF  
257 Microbiology Laboratory, for his assistance coordinating confirmatory laboratory studies. We thank  
258 Daniela Munafo and Erbay Yigit from New England Biolabs with assistance with the sequencing  
259 library preparation. We thank the Measles, Mumps, Rubella & Herpesviruses Laboratory Branch at  
260 the CDC, particularly Emily Abernathy and Dr. Joseph Icenogle, for helpful discussions regarding  
261 the possible public health implications of the RV case. We thank the Sandler and William K.  
262 Bowes, Jr. Foundations for their generous philanthropic support. Lastly, we thank our patients for  
263 their participation in this research program.  
264

265 **REFERENCES**

- 266 1. Sugita S, Ogawa M, Shimizu N, et al. Use of a comprehensive polymerase chain reaction  
267 system for diagnosis of ocular infectious diseases. *Ophthalmology* 2013; **120**(9): 1761-8.
- 268 2. Taravati P, Lam D, Van Gelder RN. Role of molecular diagnostics in ocular microbiology.  
269 *Current ophthalmology reports* 2013; **1**(4).
- 270 3. Endophthalmitis Vitrectomy Study collab. Results of the Endophthalmitis Vitrectomy Study.  
271 A randomized trial of immediate vitrectomy and of intravenous antibiotics for the treatment of  
272 postoperative bacterial endophthalmitis. Endophthalmitis Vitrectomy Study Group. *Archives of*  
273 *ophthalmology (Chicago, Ill : 1960)* 1995; **113**(12): 1479-96.
- 274 4. Varkey JB, Shantha JG, Crozier I, et al. Persistence of Ebola Virus in Ocular Fluid during  
275 Convalescence. *The New England journal of medicine* 2015; **372**(25): 2423-7.
- 276 5. de Paula Freitas B, de Oliveira Dias JR, Prazeres J, et al. Ocular Findings in Infants With  
277 Microcephaly Associated With Presumed Zika Virus Congenital Infection in Salvador, Brazil.  
278 *JAMA ophthalmology* 2016.
- 279 6. Wilson MR, Shanbhag NM, Reid MJ, et al. Diagnosing Balamuthia mandrillaris  
280 Encephalitis With Metagenomic Deep Sequencing. *Annals of neurology* 2015.
- 281 7. Wilson MR, Naccache SN, Samayoa E, et al. Actionable diagnosis of neuroleptospirosis by  
282 next-generation sequencing. *The New England journal of medicine* 2014; **370**(25): 2408-17.
- 283 8. Pak TR, Kasarskis A. How next-generation sequencing and multiscale data analysis will  
284 transform infectious disease management. *Clinical infectious diseases : an official publication of*  
285 *the Infectious Diseases Society of America* 2015; **61**(11): 1695-702.
- 286 9. GU W, Crawford E.D., O'Donovan B.D., Wilson M.R., Chow E.D., Retallack H., and  
287 DeRisi J.L. Depletion of Abundant Sequences by Hybridization (DASH): using Cas9 to remove

288 unwanted high-abundance species in sequencing libraries and molecular counting applications.

289 *Genome biology* 2016; **17**: 41.

290 10. Ruby JG, Bellare P, Derisi JL. PRICE: software for the targeted assembly of components of  
291 (Meta) genomic sequence data. *G3 (Bethesda, Md)* 2013; **3**(5): 865-80.

292 11. Dobin A, Davis CA, Schlesinger F, et al. STAR: ultrafast universal RNA-seq aligner.  
293 *Bioinformatics (Oxford, England)* 2013; **29**(1): 15-21.

294 12. Wu TD, Nacu S. Fast and SNP-tolerant detection of complex variants and splicing in short  
295 reads. *Bioinformatics (Oxford, England)* 2010; **26**(7): 873-81.

296 13. Zhu Z, Xu W, Abernathy ES, et al. Comparison of four methods using throat swabs to  
297 confirm rubella virus infection. *Journal of clinical microbiology* 2007; **45**(9): 2847-52.

298 14. Namuwulya P, Abernathy E, Bukenya H, et al. Phylogenetic analysis of rubella viruses  
299 identified in Uganda, 2003-2012. *Journal of medical virology* 2014; **86**(12): 2107-13.

300 15. Standardization of the nomenclature for genetic characteristics of wild-type rubella viruses.  
301 *Releve epidemiologique hebdomadaire / Section d'hygiene du Secretariat de la Societe des Nations*  
302 = *Weekly epidemiological record / Health Section of the Secretariat of the League of Nations* 2005;  
303 **80**(14): 126-32.

304 16. Langmead B, Salzberg SL. Fast gapped-read alignment with Bowtie 2. *Nature methods*  
305 2012; **9**(4): 357-9.

306 17. Abernathy E, Peairs RR, Chen MH, Icenogle J, Namdari H. Genomic characterization of a  
307 persistent rubella virus from a case of Fuch' uveitis syndrome in a 73 year old man. *Journal of*  
308 *clinical virology : the official publication of the Pan American Society for Clinical Virology* 2015;  
309 **69**: 104-9.

- 310 18. Dereeper A, Audic S, Claverie JM, Blanc G. BLAST-EXPLORER helps you building  
311 datasets for phylogenetic analysis. *BMC evolutionary biology* 2010; **10**: 8.
- 312 19. Dereeper A, Guignon V, Blanc G, et al. Phylogeny.fr: robust phylogenetic analysis for the  
313 non-specialist. *Nucleic acids research* 2008; **36**(Web Server issue): W465-9.
- 314 20. Edgar RC. MUSCLE: a multiple sequence alignment method with reduced time and space  
315 complexity. *BMC bioinformatics* 2004; **5**: 113.
- 316 21. Zhu Z, Rivaille P, Abernathy E, et al. Evolutionary analysis of rubella viruses in mainland  
317 China during 2010-2012: endemic circulation of genotype 1E and introductions of genotype 2B.  
318 *Scientific reports* 2015; **5**: 7999.
- 319 22. Abernathy E, Chen MH, Bera J, et al. Analysis of whole genome sequences of 16 strains of  
320 rubella virus from the United States, 1961-2009. *Virology journal* 2013; **10**: 32.
- 321 23. Lambert N, Strebel P, Orenstein W, Icenogle J, Poland GA. Rubella. *Lancet (London,*  
322 *England)* 2015; **385**(9984): 2297-307.
- 323 24. Quentin CD, Reiber H. Fuchs heterochromic cyclitis: rubella virus antibodies and genome in  
324 aqueous humor. *American journal of ophthalmology* 2004; **138**(1): 46-54.
- 325 25. Cunningham ET, Jr., Baglivo E. Fuchs heterochromic iridocyclitis--syndrome, disease, or  
326 both? *American journal of ophthalmology* 2009; **148**(4): 479-81.
- 327 26. de Groot-Mijnes JD, de Visser L, Rothova A, Schuller M, van Loon AM, Weersink AJ.  
328 Rubella virus is associated with fuchs heterochromic iridocyclitis. *American journal of*  
329 *ophthalmology* 2006; **141**(1): 212-4.
- 330 27. Reef SE, Redd SB, Abernathy E, Kutty P, Icenogle JP. Evidence used to support the  
331 achievement and maintenance of elimination of rubella and congenital rubella syndrome in the  
332 United States. *The Journal of infectious diseases* 2011; **204 Suppl 2**: S593-7.



333 28. Organization PAH. Americas Region is Declared the World's First to Eliminate Rubella.  
334 2015. Last accessed on March 2016: Available from:  
335 [http://www.paho.org/us/index.php?option=com\\_content&view=article&id=135%3Aamericas](http://www.paho.org/us/index.php?option=com_content&view=article&id=135%3Aamericas-region-free-of-rubella&Itemid=0&lang=en)  
336 [s-region-free-of-rubella&Itemid=0&lang=en](http://www.paho.org/us/index.php?option=com_content&view=article&id=135%3Aamericas-region-free-of-rubella&Itemid=0&lang=en).  
337  
338

339 **FIGURE LEGENDS**

340

341 **Table 1: Results of Unbiased Metagenomic Deep Sequencing (MDS) and Conventional**

342 **Diagnostic Tests on Intraocular Fluid Samples.** MDS correctly identifies known infections in  
343 subjects 1-3. Subjects 4 and 5 had non-infectious ocular disease and had negative MDS testing for  
344 pathogens, defined as the presence of no microbial sequences other than known laboratory and  
345 environmental contaminants. Rubella virus was identified via MDS in subject 6 and confirmed by  
346 the California Department of Public Health's RT-PCR assay. Abbreviations: Pos, positive; Neg,  
347 negative; NA, not applicable; RT-PCR, reverse transcription polymerase chain reaction; HSV-1,  
348 herpes simplex virus-1; HSV-2, herpes simplex virus-2; VZV, varicella zoster virus; CMV,  
349 cytomegalovirus; *T. gondii*, *Toxoplasma gondii*; RV, rubella virus; *C. neoformans*, *Cryptococcus*  
350 *neoformans*; RE, right eye; LE, left eye.

351

352 **Figure 1: Clinical Course and Ocular Findings of a 40 Year-Old Man With Bilateral,**

353 **Idiopathic Chronic Anterior and Intermediate Uveitis.** Panel A shows Subject 6's clinical course  
354 spanning 22 years. Panel B shows different colored irises (heterochromia) between the right and left  
355 eyes (top panels) and transillumination defects that are prominent in the left eye because of iris  
356 atrophy (lower panels). Panel C shows diffused aggregates of inflammatory cells (keratic  
357 precipitates; red arrows) on the endothelium of the cornea. Abbreviations: HSV, herpes simplex  
358 virus; VZV varicella zoster virus; CMV, cytomegalovirus; PCR, polymerase chain reaction; RE,  
359 right eye; LE, left eye; MMR, measles/mumps/rubella vaccine; MTX, methotrexate.

360

361 **Figure 2: Identification of Rubella Virus (RV) by Metagenomic Deep Sequencing.** Panel A

362 illustrates how the 9,188 nucleotide (nt) paired-end sequence reads obtained from sequencing the  
363 RNA extracted from the subject's aqueous fluid aligned to the most closely matched RV genome  
364 (DQ388280.1). 95.1% of the total RV genome is represented. Positions of synonymous (black  
365 vertical lines) and non-synonymous (red vertical lines) variants are shown. Of the 128 substitutions,  
366 92 were synonymous, and 36 were non-synonymous. Of the 36 non-synonymous mutations, 19  
367 occurred within the coding region for the E1 and E2 glycoproteins. Per unit length, the number of  
368 non-synonymous mutations in the E1 and E2 proteins was 4.1-fold higher than the non-structural  
369 proteins. The cyan marker above the E1 gene represents the 739 nt sequence window recommended  
370 by the World Health Organization (WHO) for RV genotyping. Panel B is a phylogenetic analysis of  
371 the subject's RV strain obtained from MDS with 32 WHO reference strains, GUZ\_GER92  
372 (Stuttgart strain), and the RV27/3 vaccine strain, demonstrating that the subject's RV sequence was  
373 most closely related to the genotype 1G viruses and not the vaccine strain.

374

375

**Table 1**

| Subject | Clinical Diagnosis                     | Sample Type              | MDS                                   | PCR   |       |     |     |           | RT-PCR | Culture              |
|---------|----------------------------------------|--------------------------|---------------------------------------|-------|-------|-----|-----|-----------|--------|----------------------|
|         |                                        |                          |                                       | HSV-1 | HSV-2 | VZV | CMV | T. gondii | RV     |                      |
| 1       | Anterior uveitis                       | Aqueous fluid            | <i>HSV-1</i><br>(441 reads)           | Pos   | Neg   | Neg | Neg | Neg       | NA     | NA                   |
| 2       | Panuveitis                             | Vitreous fluid           | <i>C. neoformans</i><br>(9,117 reads) | Neg   | Neg   | Neg | Neg | Neg       | NA     | <i>C. neoformans</i> |
| 3       | Panuveitis                             | Vitreous fluid           | <i>T. gondii</i><br>(2,638 reads)     | Neg   | Neg   | Neg | Neg | Pos       | NA     | NA                   |
| 4       | Panuveitis<br>(steroid responsive)     | Aqueous fluid            | Neg                                   | Neg   | Neg   | Neg | Neg | Neg       | NA     | Neg                  |
| 5       | Epiretinal membrane (non-inflammatory) | Aqueous fluid            | Neg                                   | NA    | NA    | NA  | NA  | NA        | NA     | NA                   |
|         |                                        | Vitreous fluid           | Neg                                   |       |       |     |     |           |        |                      |
| 6       | Anterior & intermediate uveitis        | Aqueous fluid, right eye | <i>RV</i><br>(599 reads)              | NA    | NA    | NA  | NA  | NA        | Pos    | NA                   |
|         |                                        | Vitreous fluid, left eye | <i>RV</i><br>(10 reads)               | Neg   | Neg   | Neg | Neg | Neg       | NA     | NA                   |
|         | Control                                | H <sub>2</sub> O         | Neg                                   | NA    | NA    | NA  | NA  | NA        | NA     | NA                   |

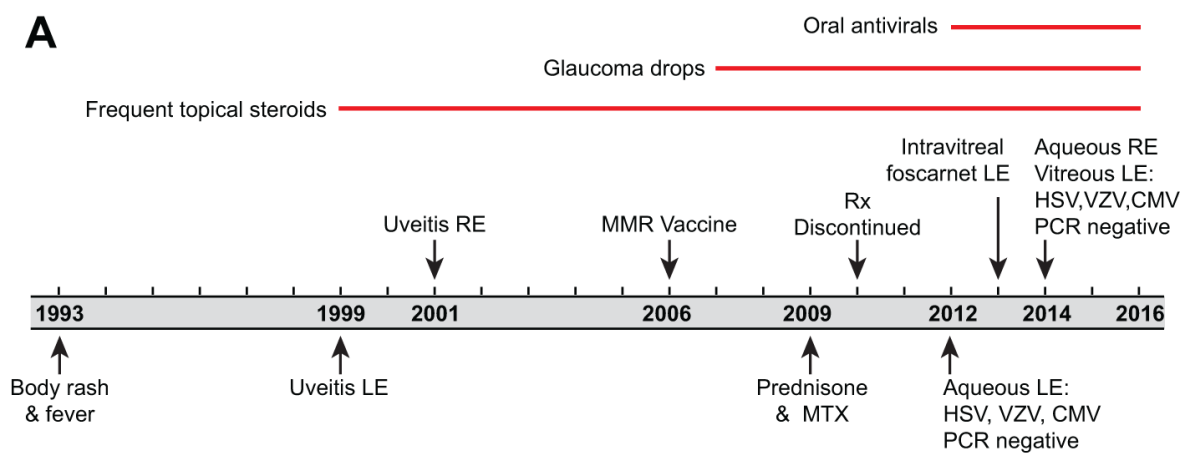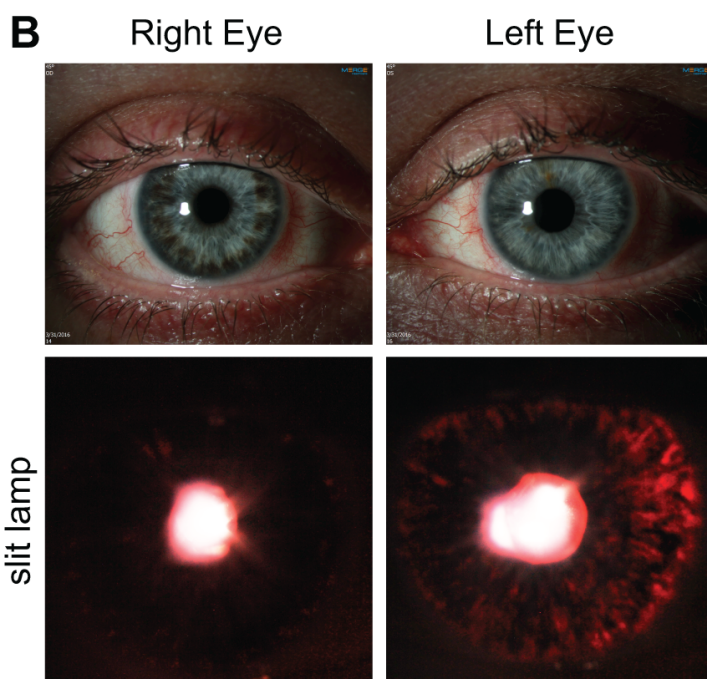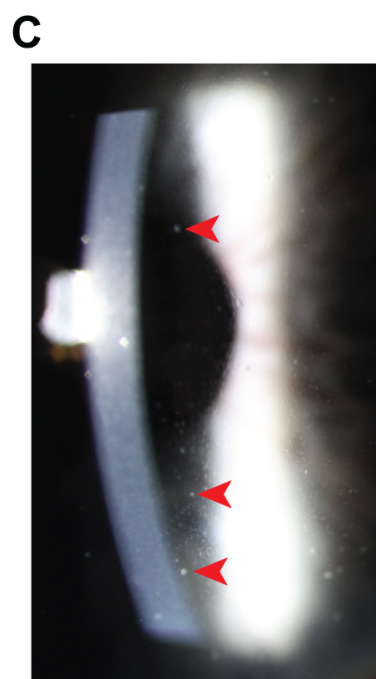

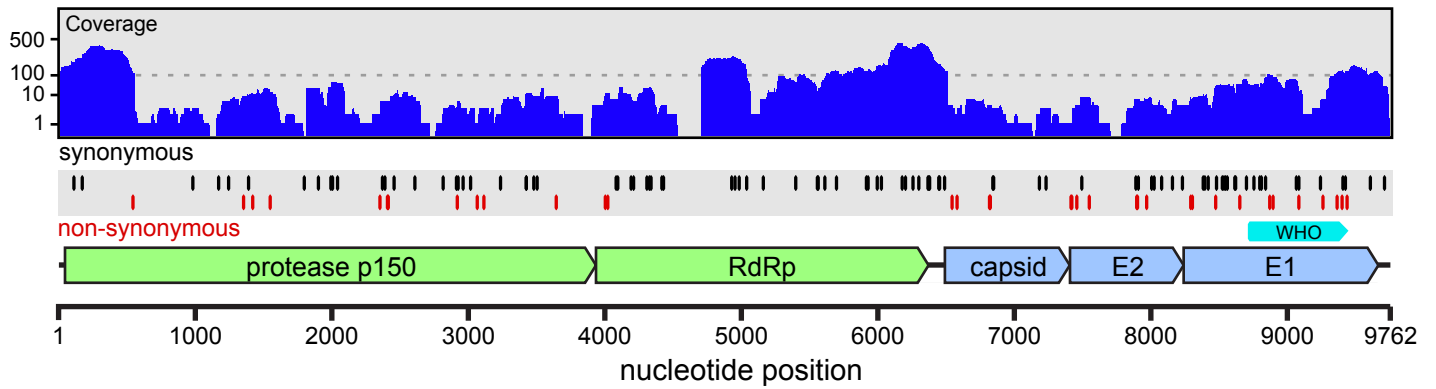

**B**

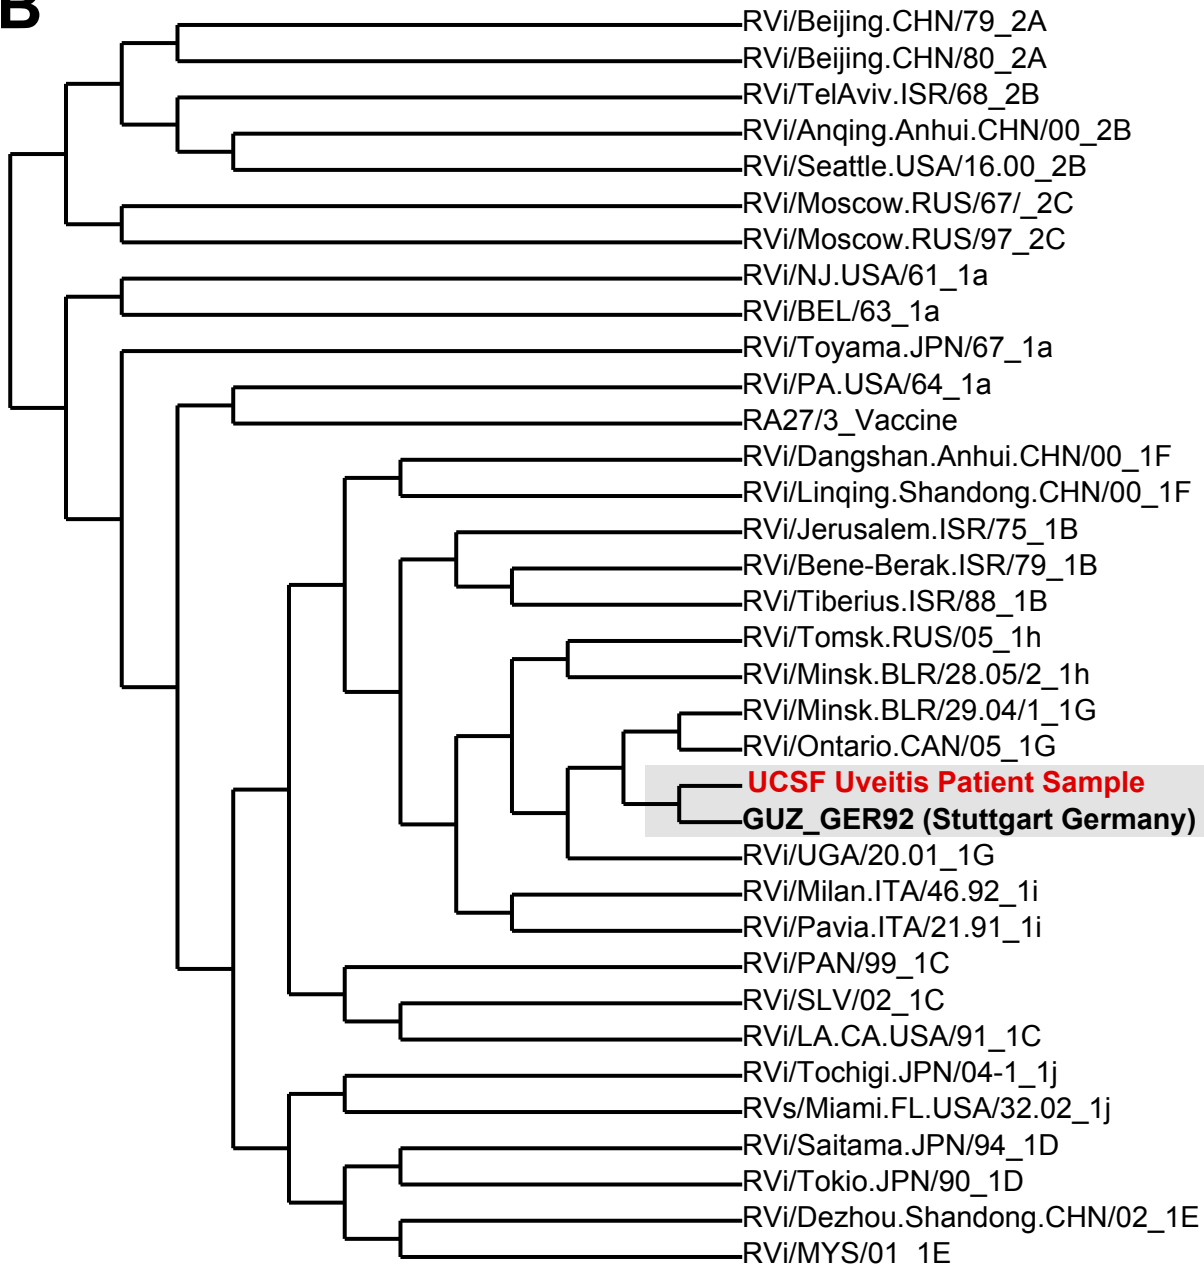

Source: http://biorxiv.org/content/biorxiv/early/2016/05/18/054148.full.pdf
